# Supplementary material for: Systematic characterization of the peroxidase gene family provides new insights into fungal pathogenicity in Magnaporthe oryzae
Source: PubMed Central journal article supplement (PMC4488832; doi:10.1038/srep11831), 2015-07-02
Supplement: srep11831-s1.pdf [file srep11831-s1.pdf]

## Supplementary Information

### Systematic characterization of the peroxidase gene family provides new insights into fungal pathogenicity in *Magnaporthe oryzae*

Albely Afifa Mir<sup>1</sup>, Sook-Young Park<sup>1,2</sup>, Md. Abu Sadat<sup>1,3</sup>, Seongbeom Kim<sup>1</sup>, Jaeyoung Choi<sup>1,4</sup>, Junhyun Jeon<sup>1,5</sup>, and Yong-Hwan Lee<sup>1</sup>

<sup>1</sup>Department of Agricultural Biotechnology, Fungal Bioinformatics Laboratory, Center for Fungal Genetic Resources, and Center for Fungal Pathogenesis, Seoul National University, Seoul 151-921, Korea

<sup>2</sup>Current Address: Korean Lichen Research Institute, Suncheon National University, Suncheon 540-742, Korea

<sup>3</sup>Current address: Division of Life Sciences, College of Life Sciences and Bioengineering, Incheon National University, Incheon 406-772, Korea

<sup>4</sup>Current Address: Department of Forest Sciences, University of Helsinki, Helsinki, Finland

<sup>5</sup>Current Address: School of Biotechnology, Yeungnam University, Gyeongsan, Gyeongbuk 712-749, Korea

Corresponding author: Yong-Hwan Lee\*

E-mail: [yonglee@snu.ac.kr](mailto:yonglee@snu.ac.kr).

Telephone: +82 2 880 4674

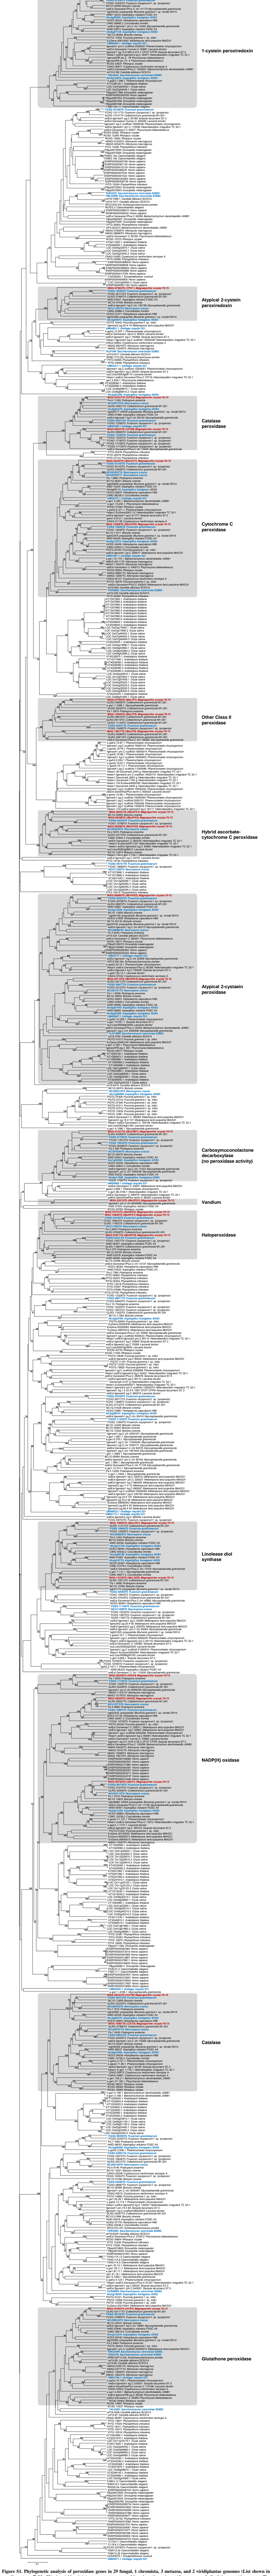

**Figure S1. Phylogenetic analysis of genes in 29 fungal, 1 chromista, 3 metazoa, and 2 viridiplantae genomes (List shown in supplementary Table S1).** A neighbor-joining tree was constructed based on the amino acid sequences of all of the peroxidase genes. The numbers at the nodes indicate bootstrap values (%) in 10,000 bootstrap replicates; only nodes supported by 50 bootstraps or more are shown. Gray boxes are the phylogenetic positions of 2% *Magnaporthe oryzae* peroxidase genes. Red and blue letters denote *M. oryzae* and five selected fungal species, respectively.

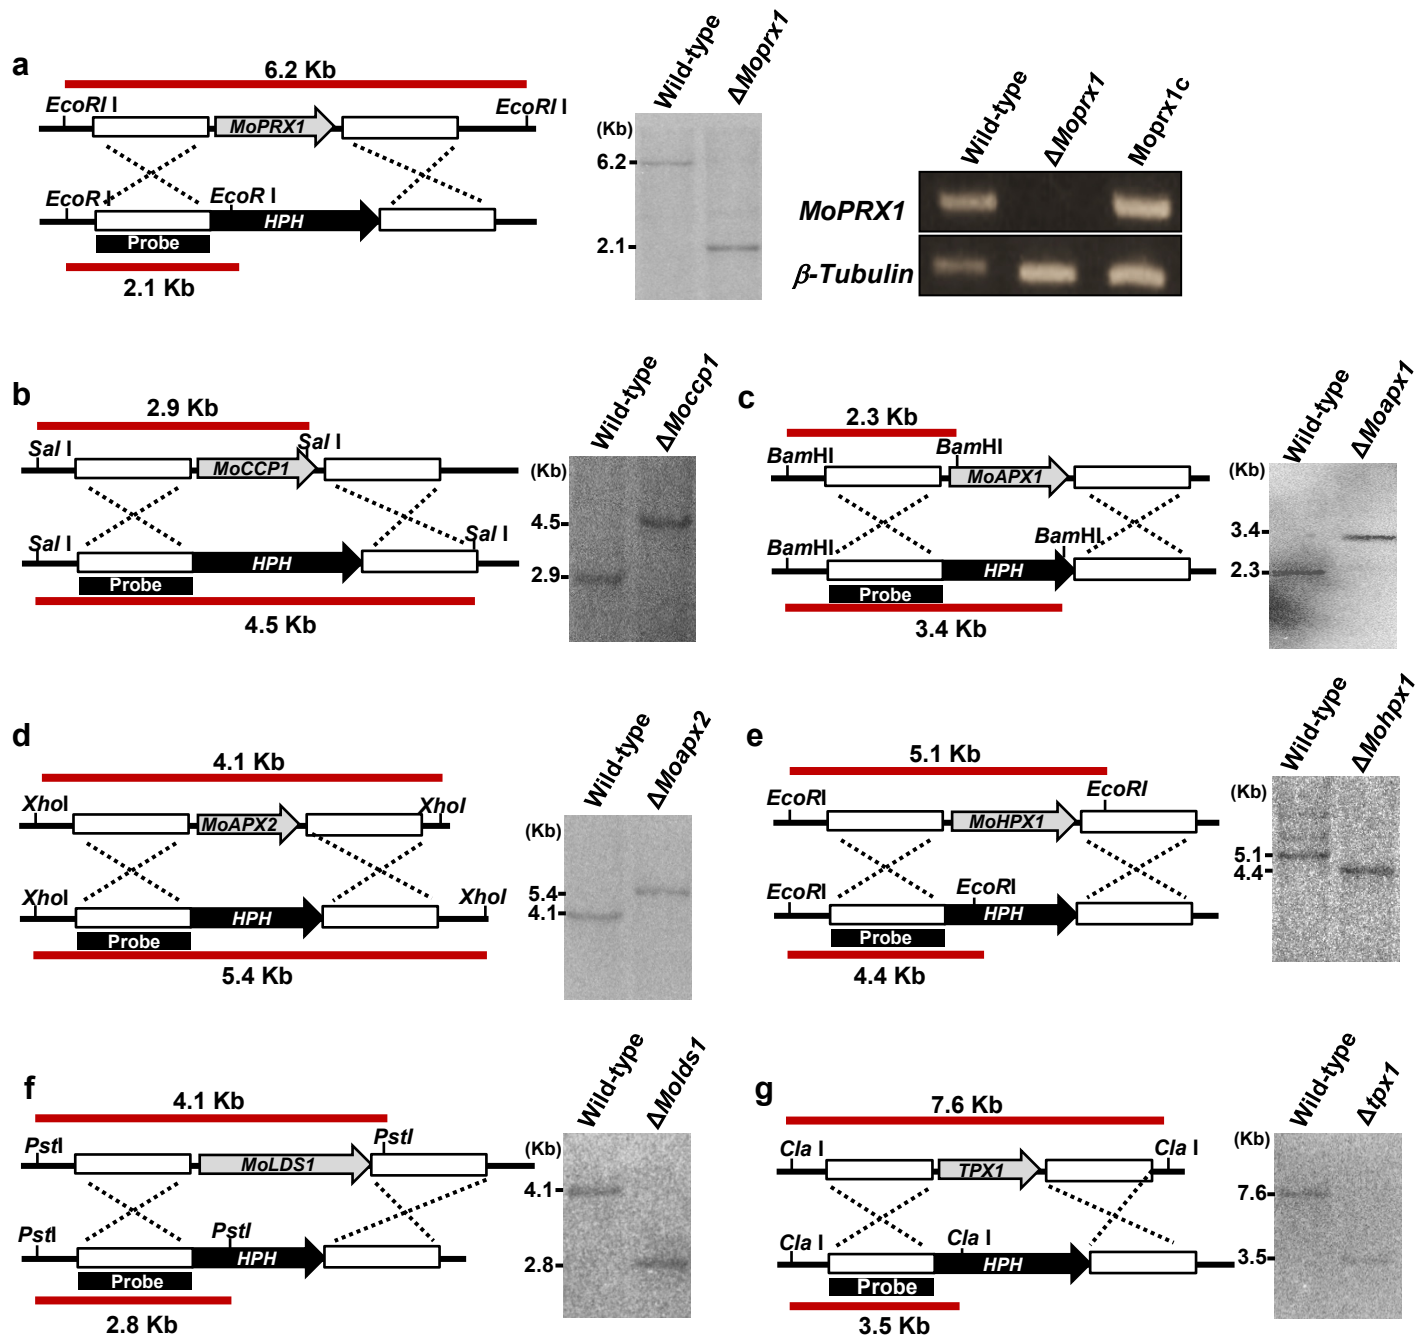

**Figure S2. Generation of deletion mutants for selected *M. oryzae* peroxidase genes.** A total of seven knockout vectors were constructed by PCR amplification. Approximately 1.2~1.5-kb upstream and downstream flanking sequences were amplified using UF/UR and DF/DR, respectively (primer list in Supplementary Table S6), and ligated with the 1.4-kb or 2.1-kb *HPH* cassette. Southern blots analysis of appropriate enzyme-digested genomic DNAs from the wild-type strain and putative gene deletion mutants. The blots were hybridized with each probe shown in Supplementary Fig. S2 (a-g). For the complementation of  $\Delta$ Moprpx1, putative complemented transformants were generated and tested for transcriptional expression of *MoPRX1* gene by RT-PCR (a).

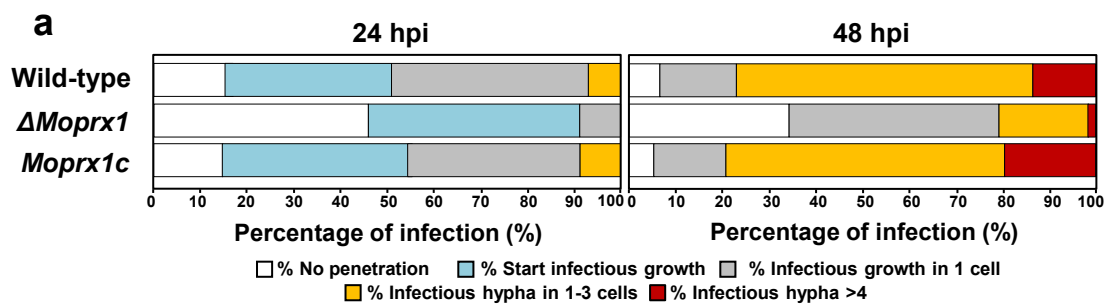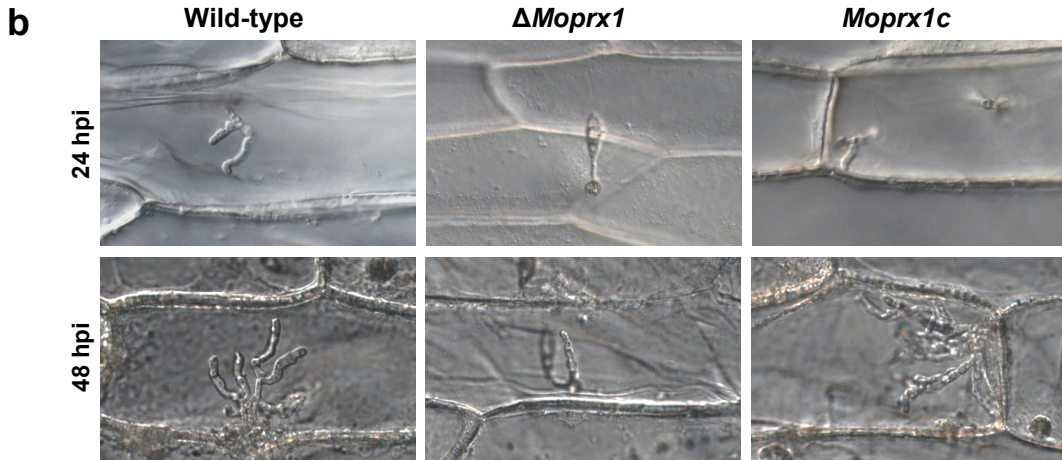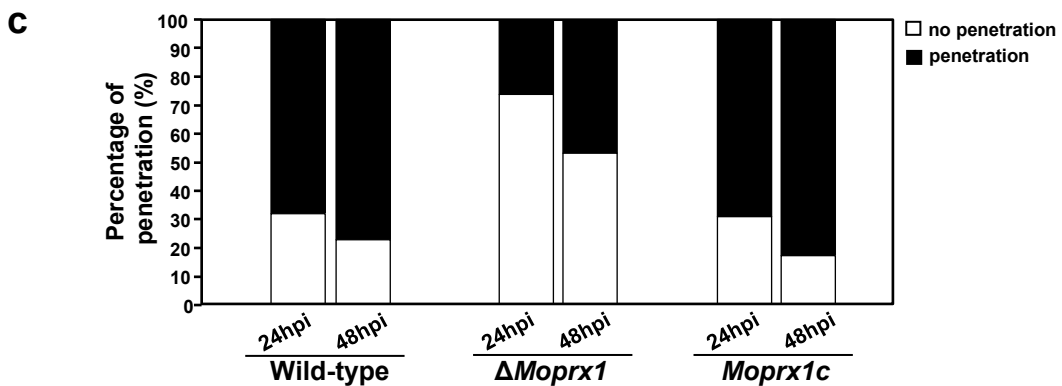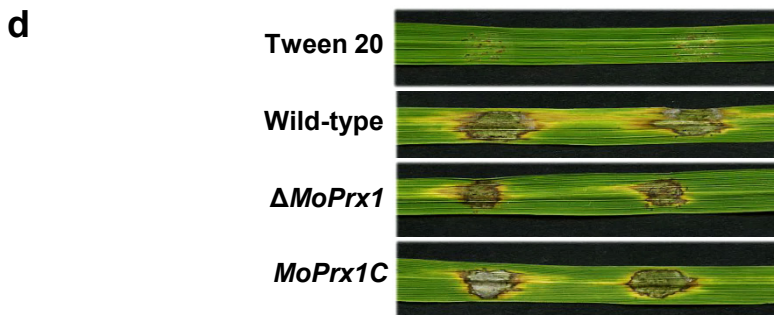

**Figure S3. Penetration percentage and pathogenicity of  $\Delta Mopr1$  on rice sheaths and leaves, and onion epidermal cells.** (a) Quantitative measurement of rice sheath assay by  $\Delta Mopr1$ . Frequency was measured by counting three replicates of 75-100 appressoria. (b) Appressorial penetration assay on onion epidermal cell by drop inoculation with  $2 \times 10^4$  conidia/ml and observed at 24 and 48 hpi. Images were captured using a 20-ms exposure to transmitted light with a DIC filter. (c) Percentage of appressorial penetration of onion epidermal cells. Data were obtained by counting three replicates of >100 appressoria. (d) Infiltration experiment on rice leaves. The conidial suspension ( $5 \times 10^4$  conidia/ml) was used as an inoculum. Photograph was taken at 5 dpi.

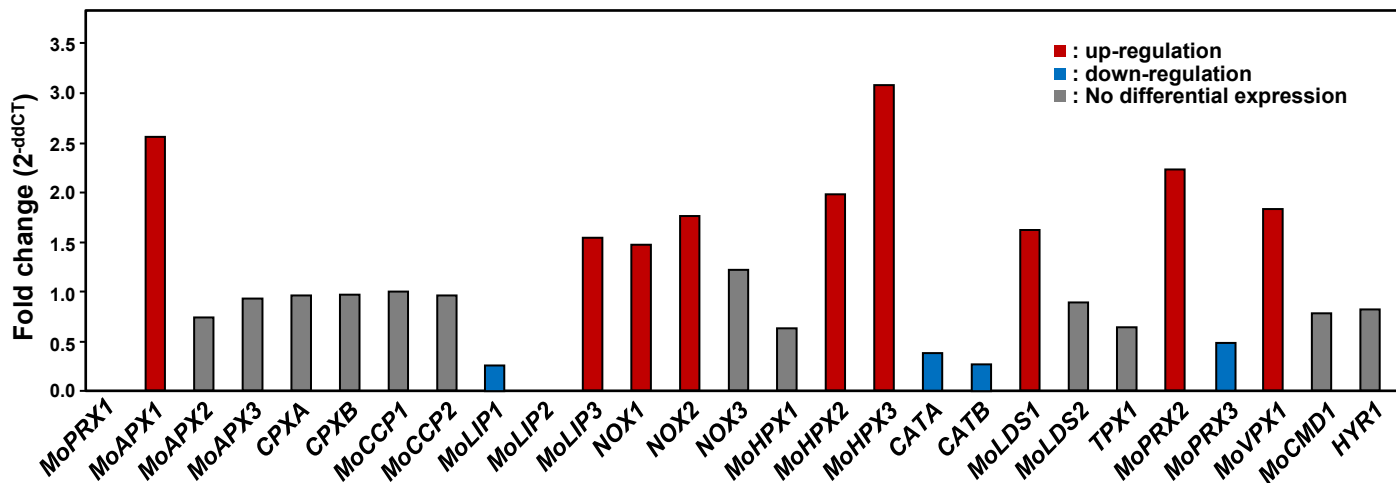

**Figure S4. Expression profiles of 27 *M. oryzae* peroxidase genes in  $\Delta MoprX1$ .** Upregulated genes (more than 1.5-fold) are indicated by red bars, and downregulated genes (less than 0.5-fold) are denoted by blue bars. The genes not showing differential expression are marked in gray.

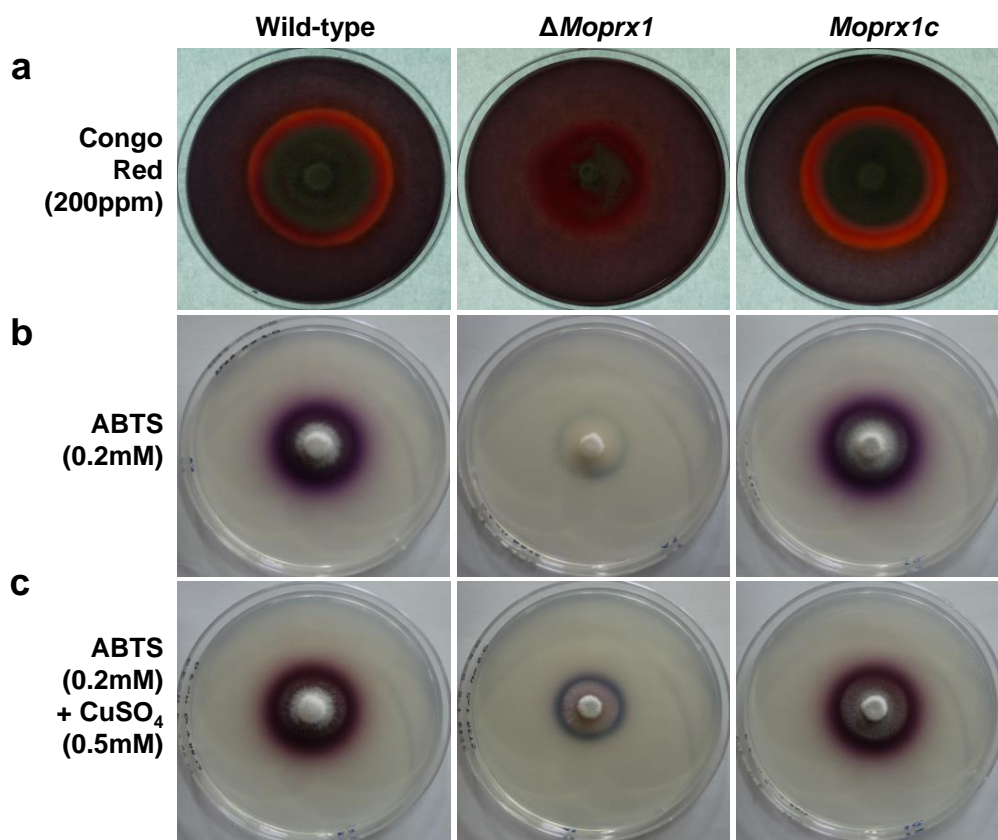

**Figure S5. Extracellular enzyme activity in  $\Delta Mopr1$ .** The wild-type,  $\Delta Mopr1$ , and *Mopr1c* strains were inoculated on complete media (CM) containing (a) 200 ppm Congo Red, and (b) 0.2 mM ABTS, and (c) 0.2 mM ABTS with 0.5 mM CuSO<sub>4</sub>. The 5-mm-diameter mycelial blocks were inoculated onto media, and incubated at 25°C. ABTS discoloration was observed at 4 dpi and Congo Red discoloration at 9 dpi.

**Table S1. Peroxidase genes from 29 fungal, three metazoan, two viridiplantae and one chromistal genomes**

| Kingdom       | Phylum/                         |                                                       | No. of                                   | Haem peroxidase |                                             |                      |         |         |                     | Non-haem peroxidase         |                                         |                        |                |                |
|---------------|---------------------------------|-------------------------------------------------------|------------------------------------------|-----------------|---------------------------------------------|----------------------|---------|---------|---------------------|-----------------------------|-----------------------------------------|------------------------|----------------|----------------|
|               | Subphylum                       | Species name                                          |                                          | Peroxidases     | Animal peroxidase-Cy clooxygene superfamily | Catalase superfamily | Class I | ClassII | DyP-type peroxidase | NAD(P)H oxidase superfamily | Alkylhydroperoxidase D-like superfamily | Glutathione peroxidase | Haloperoxidase | Peroxi-redoxin |
| Chromista     | Oomycota                        | <i>Phytophthora infestans</i>                         | 31                                       | 0               | 2                                           | 4                    | 0       | 7       | 4                   | 0                           | 7                                       | 0                      | 7              |                |
|               |                                 | <i>Aspergillus fumigatus</i> Af293                    | 25                                       | 3               | 4                                           | 3                    | 0       | 4       | 1                   | 2                           | 1                                       | 0                      | 7              |                |
| Fungi         | Ascomycota                      | <i>Aspergillus nidulans</i>                           | 25                                       | 3               | 4                                           | 3                    | 0       | 5       | 1                   | 2                           | 1                                       | 0                      | 6              |                |
|               |                                 | <i>Blumeria graminis</i> f.sp. <i>hordei</i>          | 14                                       | 2               | 2                                           | 3                    | 0       | 0       | 2                   | 0                           | 1                                       | 0                      | 4              |                |
|               |                                 | <i>Botrytis cinerea</i>                               | 30                                       | 2               | 6                                           | 4                    | 0       | 9       | 1                   | 1                           | 1                                       | 0                      | 6              |                |
|               |                                 | <i>Candida albicans</i> SC5314                        | 14                                       | 0               | 1                                           | 2                    | 0       | 0       | 0                   | 0                           | 4                                       | 0                      | 7              |                |
|               |                                 | <i>Coccidioides immitis</i> RS                        | 15                                       | 3               | 2                                           | 3                    | 0       | 0       | 2                   | 1                           | 1                                       | 0                      | 3              |                |
|               |                                 | <i>Colletotrichum graminicola</i> M1.001              | 34                                       | 4               | 4                                           | 4                    | 7       | 5       | 3                   | 1                           | 1                                       | 0                      | 5              |                |
|               |                                 | <i>Fusarium graminearum</i>                           | 31                                       | 4               | 5                                           | 5                    | 1       | 5       | 3                   | 2                           | 1                                       | 0                      | 5              |                |
|               |                                 | <i>Fusarium oxysporum</i>                             | 45                                       | 7               | 6                                           | 8                    | 1       | 10      | 3                   | 3                           | 1                                       | 0                      | 6              |                |
|               |                                 | <i>Histoplasma capsulatum</i> H88                     | 18                                       | 3               | 3                                           | 2                    | 0       | 2       | 2                   | 1                           | 1                                       | 0                      | 4              |                |
|               |                                 | <i>Magnaporthe oryzae</i> 70-15                       | 27                                       | 2               | 2                                           | 7                    | 3       | 3       | 3                   | 1                           | 1                                       | 1                      | 4              |                |
|               |                                 | <i>Mycosphaerella graminicola</i>                     | 42                                       | 4               | 3                                           | 2                    | 2       | 18      | 2                   | 2                           | 1                                       | 1                      | 7              |                |
|               |                                 | <i>Neurospora crassa</i>                              | 20                                       | 3               | 3                                           | 4                    | 0       | 2       | 2                   | 1                           | 1                                       | 0                      | 4              |                |
|               |                                 | <i>Podospora anserina</i>                             | 23                                       | 2               | 4                                           | 3                    | 1       | 5       | 3                   | 1                           | 1                                       | 0                      | 3              |                |
|               |                                 | <i>Saccharomyces cerevisiae</i> S288C                 | 11                                       | 0               | 2                                           | 1                    | 0       | 0       | 0                   | 0                           | 3                                       | 0                      | 5              |                |
|               |                                 | <i>Schizosaccharomyces pombe</i> 132                  | 5                                        | 0               | 1                                           | 0                    | 0       | 0       | 0                   | 0                           | 1                                       | 0                      | 3              |                |
|               | Basidiomycota                   | <i>Cryptococcus neoformans</i> var. <i>grubii</i> H99 | 14                                       | 0               | 4                                           | 2                    | 0       | 0       | 0                   | 0                           | 3                                       | 0                      | 5              |                |
|               |                                 | <i>Heterobasidion irregulare</i> TC 32-1              | 32                                       | 2               | 3                                           | 5                    | 7       | 6       | 2                   | 2                           | 0                                       | 0                      | 5              |                |
|               |                                 | <i>Laccaria bicolor</i>                               | 23                                       | 2               | 1                                           | 2                    | 1       | 7       | 2                   | 1                           | 1                                       | 0                      | 6              |                |
|               |                                 | <i>Melampsora larici-populina</i> 98AG31              | 39                                       | 3               | 6                                           | 2                    | 0       | 18      | 5                   | 1                           | 1                                       | 0                      | 3              |                |
|               |                                 | <i>Phanerochaete chrysosporium</i>                    | 39                                       | 3               | 5                                           | 1                    | 16      | 3       | 2                   | 1                           | 1                                       | 0                      | 7              |                |
|               |                                 | <i>Puccinia graminis</i> f. sp. <i>tritici</i>        | 24                                       | 0               | 4                                           | 2                    | 0       | 12      | 2                   | 0                           | 1                                       | 0                      | 3              |                |
|               |                                 | <i>Serpula lacrymans</i> S7.3                         | 19                                       | 2               | 4                                           | 1                    | 0       | 3       | 2                   | 0                           | 1                                       | 0                      | 6              |                |
|               |                                 | <i>Ustilago maydis</i> 521                            | 14                                       | 1               | 0                                           | 3                    | 0       | 3       | 0                   | 1                           | 1                                       | 0                      | 5              |                |
|               |                                 | Blastocladiomycota                                    | <i>Allomyces macrogynus</i>              | 21              | 0                                           | 0                    | 4       | 0       | 0                   | 7                           | 0                                       | 4                      | 0              | 6              |
|               |                                 | Chytridiomycota                                       | <i>Batrachomyces dendrobatidis</i> JAM81 | 11              | 0                                           | 3                    | 2       | 0       | 0                   | 1                           | 0                                       | 1                      | 0              | 4              |
| Microsporidia | <i>Encephalitozoon cuniculi</i> | 2                                                     | 0                                        | 0               | 0                                           | 0                    | 0       | 0       | 0                   | 1                           | 0                                       | 1                      |                |                |
| Zygomycota    | <i>Phycomyces blakesleeanus</i> | 14                                                    | 0                                        | 2               | 2                                           | 0                    | 0       | 0       | 0                   | 2                           | 0                                       | 8                      |                |                |
|               | <i>Rhizopus oryzae</i>          | 19                                                    | 0                                        | 4               | 3                                           | 0                    | 2       | 0       | 0                   | 3                           | 0                                       | 7                      |                |                |
| Metazoa       | Arthropoda                      | <i>Drosophila melanogaster</i>                        | 20                                       | 0               | 2                                           | 0                    | 0       | 0       | 2                   | 0                           | 4                                       | 0                      | 12             |                |
|               | Chordata                        | <i>Homo sapiens</i>                                   | 53                                       | 0               | 1                                           | 0                    | 0       | 0       | 19                  | 0                           | 13                                      | 0                      | 20             |                |
|               | Nematoda                        | <i>Caenorhabditis elegans</i>                         | 16                                       | 0               | 3                                           | 0                    | 0       | 0       | 2                   | 0                           | 7                                       | 0                      | 4              |                |
| Viridiplantae | Streptophyta                    | <i>Arabidopsis thaliana</i>                           | 63                                       | 3               | 7                                           | 18                   | 0       | 0       | 14                  | 0                           | 9                                       | 0                      | 12             |                |
|               |                                 | <i>Oryza sativa</i> (japonica cultivar-group)         | 63                                       | 4               | 6                                           | 18                   | 0       | 0       | 17                  | 0                           | 7                                       | 0                      | 11             |                |
| <b>Total</b>  |                                 |                                                       | 896                                      | 62              | 109                                         | 123                  | 39      | 129     | 109                 | 24                          | 88                                      | 2                      | 211            |                |

**Table S2. Predicted peroxidase genes in *M. oryzae***

| Class                       | Type                                   | Locus                                                       | Protein Length | Signal peptide | Annotation |                                                       |                                     |
|-----------------------------|----------------------------------------|-------------------------------------------------------------|----------------|----------------|------------|-------------------------------------------------------|-------------------------------------|
| Haem                        | Class I peroxidase                     | Hybrid Ascorbate-Cytochrome C peroxidase                    | MGG_00461      | 476            |            | hypothetical protein, <i>MoAPX1</i>                   |                                     |
|                             |                                        |                                                             | MGG_08200      | 804            | V          | hypothetical protein, <i>MoAPX2</i>                   |                                     |
|                             |                                        |                                                             | MGG_09398      | 548            | V          | hypothetical protein, <i>MoAPX3</i>                   |                                     |
|                             | Catalase peroxidase                    |                                                             | MGG_04337      | 750            |            | catalase-peroxidase 1, <i>CPXA</i>                    |                                     |
|                             |                                        |                                                             | MGG_09834      | 786            | V          | catalase-peroxidase 2, <i>CPXB</i>                    |                                     |
|                             | Cytochrome C peroxidase                |                                                             | MGG_04545      | 362            |            | cytochrome c peroxidase, <i>MoCCP1</i>                |                                     |
|                             |                                        |                                                             | MGG_10368      | 300            |            | cytochrome c peroxidase, <i>MoCCP2</i>                |                                     |
|                             | Class II peroxidase                    | Other class II peroxidase                                   |                | MGG_07790      | 474        | V                                                     | ligninase H2, <i>MoLIP1</i>         |
|                             |                                        |                                                             |                | MGG_10877      | 264        | V                                                     | hypothetical protein, <i>MoLIP2</i> |
|                             |                                        |                                                             |                | MGG_14940      | 428        |                                                       | ligninase C, <i>MoLIP3</i>          |
| NAD(P)H oxidase superfamily | NADP(H) oxidase                        |                                                             | MGG_00750      | 553            |            | cytochrome b-245 heavychain subunit beta, <i>NOX1</i> |                                     |
|                             |                                        |                                                             | MGG_06559      | 582            |            | cytochrome b-245 heavychain subunit beta, <i>NOX2</i> |                                     |
| DyP-type peroxidase         | Haloperoxidase (haem)                  |                                                             | MGG_16840      | 242            | V          | hypothetical protein, <i>MoHPX1</i>                   |                                     |
|                             |                                        |                                                             | MGG_07574      | 257            | V          | hypothetical protein, <i>MoHPX2</i>                   |                                     |
|                             |                                        |                                                             | MGG_07871      | 241            | V          | hypothetical protein, <i>MoHPX3</i>                   |                                     |
| Catalase superfamily        | Catalase                               |                                                             | MGG_10061      | 743            |            | catalase-1, <i>CATA</i>                               |                                     |
|                             |                                        |                                                             | MGG_06442      | 715            | V          | catalase-3, <i>CATB</i>                               |                                     |
| Animal peroxidase           | Linoleate diol synthase (PGHS like)    |                                                             | MGG_10859      | 1153           |            | heme peroxidase, <i>MoLDS1</i>                        |                                     |
|                             |                                        |                                                             | MGG_13239      | 1171           |            | linoleate diol synthase, <i>MoLDS2</i>                |                                     |
| Non haem                    | Peroxiredoxin                          | 1-Cysteine peroxiredoxin                                    | MGG_08256      | 224            |            | mitochondrial peroxiredoxin PRX1, <i>MoPRX1</i>       |                                     |
|                             |                                        | Atypical 2-Cysteine peroxiredoxin (type Q, BCP)             | MGG_07503      | 314            |            | thioredoxin peroxidase, <i>TPX1</i>                   |                                     |
|                             |                                        | Atypical 2-Cysteine peroxiredoxin (type II &V)              | MGG_00860      | 184            |            | AphC/TSA family protein, <i>MoPRX2</i>                |                                     |
|                             | Haloperoxidase                         | Vanadium chloroperoxidase                                   | MGG_02210      | 595            |            | vanadium chloroperoxidase, <i>MoVPX1</i>              |                                     |
|                             | Alkyhydroperoxidase D-like superfamily | Carboxymuconolactone decarboxylase (no peroxidase activity) | MGG_01347      | 243            |            | 4-carboxymuconolactone decarboxylase, <i>MoCMD1</i>   |                                     |
|                             | Glutathione peroxidase                 | Fungi-Bacteria glutathione peroxidase                       | MGG_07460      | 172            |            | peroxiredoxin HYR1, <i>HYR1</i>                       |                                     |





**Table S4. Characterization of transformants including deletion mutants for seven peroxidase genes in *M. oryzae* pathogenicity-related phenotypes**

| Strain        | Conidiation<br>(10 <sup>5</sup> / ml) <sup>a</sup> | Conidial germination<br>(%) <sup>b</sup> | Appressorium formation<br>(%) <sup>c</sup> |
|---------------|----------------------------------------------------|------------------------------------------|--------------------------------------------|
| Wild-type     | 55.7±1.5 <sup>E d</sup>                            | 97.7±1.5 <sup>B</sup>                    | 97.3±1.5 <sup>BC</sup>                     |
| <i>ΔMopr1</i> | 42.7±7.5 <sup>B</sup>                              | 96.7±1.2 <sup>AB</sup>                   | 93.0±3.6 <sup>A</sup>                      |
| <i>Mopr1c</i> | 56.3±1.5 <sup>E</sup>                              | 94.3±1.5 <sup>A</sup>                    | 96.0±1.0 <sup>ABC</sup>                    |
| <i>ΔMocp1</i> | 49.0±1.0 <sup>CD</sup>                             | 96.3±0.6 <sup>AB</sup>                   | 95.0±2.6 <sup>ABC</sup>                    |
| <i>ΔMoap1</i> | 57.3±1.2 <sup>E</sup>                              | 95.7±0.6 <sup>AB</sup>                   | 94.7±2.1 <sup>AB</sup>                     |
| <i>ΔMoap2</i> | 44.7±2.3 <sup>BC</sup>                             | 94.7±1.5 <sup>A</sup>                    | 97.7±0.6 <sup>BC</sup>                     |
| <i>ΔMohp1</i> | 50.3±1.5 <sup>D</sup>                              | 97.7±0.6 <sup>B</sup>                    | 98.3±0.6 <sup>C</sup>                      |
| <i>ΔMold1</i> | 47.0±1.0 <sup>BCD</sup>                            | 95.7±1.5 <sup>AB</sup>                   | 95.0±1.0 <sup>ABC</sup>                    |
| <i>Δtp1</i>   | 10.7±2.1 <sup>A</sup>                              | 96.7±1.5 <sup>AB</sup>                   | 96.0±1.0 <sup>ABC</sup>                    |

<sup>a</sup> Conidiation was measured by counting the number of conidia collected with 5 ml of sterilized distilled water from 7-day-old V8 juice agar plate; <sup>b</sup> Percentage of conidial germination on hydrophobic surfaces was measured under a light microscope with three replicates; <sup>c</sup> Percentage of appressorium formation on hydrophobic surfaces was measured using germinated conidia with three replicates; <sup>d</sup> Duncan's test was used to determine significance at the 95% probability level. The same letters in a column showed no significant difference.

**Table S5. Total RNA was extracted from five conditions including infection-related developments (conidia, germinated conidia, appressoria, and infectious growth) and oxidative stress treatment**

| Categories                     | Conditions                                                     | Conc.  | Treated time | Basal medium for treatment |
|--------------------------------|----------------------------------------------------------------|--------|--------------|----------------------------|
| Infection-related developments | Conidia<br>Germinated conidia<br>Appressoria<br>78 hpi on rice |        |              |                            |
| Oxidative stress               | H <sub>2</sub> O <sub>2</sub>                                  | 2.5 mM | 4 h          | CM                         |

Note: Germinated conidia and appressoria were harvested after 4 h and 16 h, respectively, on hydrophobic surface for RNA extraction.

Table S6. List of primers used in this study

| Primer name                 | Sequence (5' → 3')                                                       |
|-----------------------------|--------------------------------------------------------------------------|
| <b>Knock-out constructs</b> |                                                                          |
| <b><i>MoPRX1</i></b>        |                                                                          |
| <i>MoPRX1</i> _UF           | TTC CAG GGG TAC TAT GGC AAC AA                                           |
| <i>MoPRX1</i> _UR           | CCT CCA CTA GCT CCA GCC AAG CC AAT CCG GGC CCA GTT TAG GTT TAT           |
| <i>MoPRX1</i> _DF           | GTT GGT GTC GAT GTC AGC TCC GGA G TCA ATA TGG CGC CGC AGC AGT AAT        |
| <i>MoPRX1</i> _DR           | GTACTCGCCTGCCCTGCCTATCTT                                                 |
| <i>MoPRX1</i> _UNF          | GCTGCTAAAGGGATTGGCTACTCA                                                 |
| <i>MoPRX1</i> _DNR          | ATGGTCGCCGCTATTTGCTTATG                                                  |
| <i>MoPRX1</i> _UF_F         | ATAAACCTAAACTGGGCCCGGATT                                                 |
| <i>MoPRX1</i> _DF_R         | ATTACTGCTGCGGCGCCATATTGA                                                 |
| <b><i>MoCCPI</i></b>        |                                                                          |
| <i>MoCCPI</i> _UF           | TCT CGT TCC TGC AGA TGC CGT C                                            |
| <i>MoCCPI</i> _UR           | CCT CCA CTA GCT CCA GCC AAG CC TGA GGT CTC TGA CTT CAG TGG TAG GT        |
| <i>MoCCPI</i> _DF           | GTT GGT GTC GAT GTC AGC TCC GGA G TTG GGG AGG ACT TGA TGG TTA GAC TTG    |
| <i>MoCCPI</i> _DR           | CAG CCT GGA CTC GAG CAA CAC                                              |
| <i>MoCCPI</i> _UNF          | GCC GGA ACT TCC AGT TTG AAG ACA ACT ACC TA                               |
| <i>MoCCPI</i> _DNR          | AAA CTG AGC GAG GAC TAC GAC GCC                                          |
| <i>MoCCPI</i> _UR_F         | ACC TAC CAC TGA AGT CAG AGA CCT CA                                       |
| <i>MoCCPI</i> _DF_R         | CAA GTC TAA CCA TCA AGT CCT CCC CAA                                      |
| <b><i>MoAPX1</i></b>        |                                                                          |
| <i>MoAPX1</i> _UF           | CAG TGG AGG AAT CAG CAA CTC TCA GC                                       |
| <i>MoAPX1</i> _UR           | CCT CCA CTA GCT CCA GCC AAG CC CCA TTG CCT TTA TGC GGA AGT TCT TGT       |
| <i>MoAPX1</i> _DF           | GTT GGT GTC GAT GTC AGC TCC GGA G CAT GAG CGC GTT TCA CAG GAC TC         |
| <i>MoAPX1</i> _DR           | TGA CAC GCC AAG ACC TAC CAC AGA G                                        |
| <i>MoAPX1</i> _UNF          | AAG GGG AAA CAT TGC GCA GAC ATC ACA                                      |
| <i>MoAPX1</i> _DNR          | CTT GCC AGC CTA TCT TGT CCA GTA GTG G                                    |
| <i>MoAPX1</i> _UR_F         | ACA AGA ACT TCC GCA TAA AGG CAA TGG                                      |
| <i>MoAPX1</i> _DF_R         | GAG TCC TGT GAA ACG CGC TCA TG                                           |
| <b><i>MoAPX2</i></b>        |                                                                          |
| <i>MoAPX2</i> _UF           | GCG GCT ATA GAA AGA TCC GGC ATG AAT                                      |
| <i>MoAPX2</i> _UR           | CCT CCA CTA GCT CCA GCC AAG CC ACA GCA GAT TGT GTG GTG ATG CAC           |
| <i>MoAPX2</i> _DF           | GTT GGT GTC GAT GTC AGC TCC GGA G GGA TGA GAA TGA GCC AAG CAG GGA ATT    |
| <i>MoAPX2</i> _DR           | TCG GAG ACG CCT AGC CTT CCC TA                                           |
| <i>MoAPX2</i> _UNF          | AAG GTC TCT TAA GGC ACA TTT CGT GCG G                                    |
| <i>MoAPX2</i> _DNR          | TGC CCC TAG AAC TCG TTA GTC AGT CTA GTT CG                               |
| <i>MoAPX2</i> _UR_F         | GTG CAT CAC CAC ACA ATC TGC TGT                                          |
| <i>MoAPX2</i> _DF_R         | AAT TCC CTG CTT GGC TCA TTC TCA TCC                                      |
| <b><i>MoHPX1</i></b>        |                                                                          |
| <i>MoHPX1</i> _UF           | TCGTGAGAGGTGAGGACAATAAAC                                                 |
| <i>MoHPX1</i> _UR           | CCT CCA CTA GCT CCA GCC AAG CC CTG CCA AAG GAC GAA GGA TTG AAA           |
| <i>MoHPX1</i> _DF           | GTT GGT GTC GAT GTC AGC TCC GGA G ACT GCT GTT TGA GAT GTC CA             |
| <i>MoHPX1</i> _DR           | CAA CAC GCA TGA CTC CAC CTA CAA                                          |
| <i>MoHPX1</i> _UNF          | TGG CTA GAC ATC TGA GGT TAT                                              |
| <i>MoHPX1</i> _DNR          | CTG GTT CGA GGA TGT TTA GTT                                              |
| <i>MoHPX1</i> _UR_F         | TTT CAA TCC TTC GTC CTT TGG CAG                                          |
| <i>MoHPX1</i> _DF_R         | TGG ACA TCT CAA ACA GCA GT                                               |
| <b><i>MoLDS1</i></b>        |                                                                          |
| <i>MoLDS1</i> _UF           | GGT AAG TAA CAT GCT AGG CAT TTG GAG TCT CG                               |
| <i>MoLDS1</i> _UR           | CCT CCA CTA GCT CCA GCC AAG CC GCA ATG GGA ACG CCA TCG TGT ATT           |
| <i>MoLDS1</i> _DF           | GTT GGT GTC GAT GTC AGC TCC GGA G TGA CTG TTG GTG GGA TAA GAC TGA ATG AA |

|                   |                                               |
|-------------------|-----------------------------------------------|
| <i>MoLDS1_DR</i>  | GAC TGG AAA GTG CCA AGT ATC CTG CTA           |
| <i>MoLDS1_UNF</i> | GCG GTC TGA TAG ACC AAT TAA TAG CGA GGC TAA C |
| <i>MoLDS1_DNR</i> | ACA TTC AGG GAC AAT GAA TAC GTC CCT GCA G     |

**TPXI**

|                  |                                                               |
|------------------|---------------------------------------------------------------|
| <i>TPXI_UF</i>   | GCG GTT GAA TCT CGG ACA TA                                    |
| <i>TPXI_UR</i>   | CCT CCA CTA GCT CCA GCC AAG CC AGG GTA TGG CTC ACG AAA CTA AG |
| <i>TPXI_DF</i>   | GTT GGT GTC GAT GTC AGC TCC GGA G TGT AGG ATG AGC GAC GAT AGT |
| <i>TPXI_DR</i>   | AAG TTC GTC GAG GTT TCG GA                                    |
| <i>TPXI_UNF</i>  | CGA ATT GAA GCA CGC TGA GAG GTT                               |
| <i>TPXI_DNR</i>  | TTG ACC TGT TCT CGC GCT TCT TTG                               |
| <i>TPXI_UR_F</i> | CTT AGT TTC GTG AGC CAT ACC CT                                |
| <i>TPXI_DF_R</i> | ACT ATC GTC GCT CAT CCT ACA                                   |

**Hygromycin phosphotransferase**

|                       |                              |
|-----------------------|------------------------------|
| <i>HPH_F</i> (1.4 Kb) | GGCTTGGCTGGAGCTAGTGGAGG      |
| <i>HPH_R</i> (1.4Kb)  | GTTGGTGTTCGATGTCAGCTCCGGAG   |
| <i>HPH_F</i> (2.1 Kb) | AGAAGATGATATTGAAAGG          |
| <i>HPH_R</i> (2.1Kb)  | GCACAGGTACACTTGTTTAGAG       |
| <i>SYP_HPH_R</i>      | ATGCCTGAACTCACGCGACGTCTGTGCG |

**GFP tagging**

|                             |                                |
|-----------------------------|--------------------------------|
| <i>MoPRX1_ORF_R_eGFP</i>    | TCGCCCTTGCTCACCATCTCCT TGGGCAG |
| <i>eGFP_F</i>               | ATGGTGAGCAAGGGCGAGGAG          |
| <i>NcTerm_R</i>             | ATCATCATGCAACATGCA             |
| <i>NcTerm_R_nested</i>      | GATGTATTAAGAGTATAGGGGTC        |
| <i>MoPRX1_ORF_F_HindIII</i> | AAGCTTATGGCCGAAGAGCAGCGT       |
| <i>MoPRX1_ORF_R_Xbal</i>    | TCTAGACTACTCCTTGGGCAGCGGCGTA   |

**qRT-PCR**

|                     |                         |
|---------------------|-------------------------|
| $\beta$ -Tubulin    |                         |
| <i>TubF</i>         | CTCCAGGGTTTCCAGATCAC    |
| <i>TubR</i>         | CCTCACCAGTGTACCAATGC    |
| <i>MoAPX1_qRT_F</i> | CTTTCAGCCATGGTGTCTCTG   |
| <i>MoAPX1_qRT_R</i> | ATGCTTCCAGCTCATCGT      |
| <i>MoAPX2_qRT_F</i> | CAGGACTTGAAGACACTTGGG   |
| <i>MoAPX2_qRT_R</i> | GTAACAGTGAAGGACGAGATACC |
| <i>MoAPX3_qRT_F</i> | ACGCCAGCATCTTTTACGAG    |
| <i>MoAPX3_qRT_R</i> | CAAGGTCTCAAACGTCGAG     |
| <i>CPXA_qRT_F</i>   | TGTTCCCGTTCCATTCACCT    |
| <i>CPXA_qRT_R</i>   | GATCTGTTCCGTGGTAACTCG   |
| <i>CPXB_qRT_F</i>   | TGACCTGATTGACGATGCC     |
| <i>CPXB_qRT_R</i>   | CTTGTCAGAGTTGCGGTAGG    |
| <i>MoCCP1_qRT_F</i> | GATGGTCCTAAGCAGTACGTC   |
| <i>MoCCP1_qRT_R</i> | CGGCAGAGAAGTCCTTGAAG    |
| <i>MoCCP2_qRT_F</i> | ACGGGTCTGAAGCAGTTTG     |
| <i>MoCCP2_qRT_R</i> | GAAATCCGCAAAGAACAGGTC   |
| <i>MoLIP1_qRT_F</i> | GCGTCCCACACTTCTCAC      |
| <i>MoLIP1_qRT_R</i> | GCTTGTGCGTGAAGTTTTCG    |
| <i>MoLIP2_qRT_F</i> | CGTCAATGGTAACAACTCTGC   |
| <i>MoLIP2_qRT_R</i> | AGGAAAGCAGTCATGGAAGG    |

|                     |                         |
|---------------------|-------------------------|
| <i>MoLIP3_qRT_F</i> | CTTCACCTCTTGACTCAACCG   |
| <i>MoLIP3_qRT_R</i> | ATGGAGGGATAAATGTCGGTG   |
| <i>NOX3_qRT_F</i>   | ATCAACACCCAGAGAAACCC    |
| <i>NOX3_qRT_R</i>   | GTACTACTACATTCGGGTCATCG |
| <i>NOX2_qRT_F</i>   | GAGAGGCAGAAGGAACTTACG   |
| <i>NOX2_qRT_R</i>   | TCCTTGACAGCATAGTTGACG   |
| <i>NOX1_qRT_F</i>   | ATTGATGGTCCCTATGGTGC    |
| <i>NOX1_qRT_R</i>   | ACCAATACCAGTTCCAATGAGG  |
| <i>MoHPX1_qRT_F</i> | GGAAGGACTGGGTCAAGATTC   |
| <i>MoHPX1_qRT_R</i> | TTTCTGGGCTGTGATCTTG     |
| <i>MoHPX2_qRT_F</i> | TTCACCTTTATCGAGTCGGC    |
| <i>MoHPX2_qRT_R</i> | TGCTCGAAAGGAAGACGTTG    |
| <i>MoHPX3_qRT_F</i> | CGGGAGTGGTTGAAGGTTAAT   |
| <i>MoHPX3_qRT_R</i> | CCTGCTCAAACCTTGTGGAAAC  |
| <i>CATA_qRT_F</i>   | ACTTTAGCAACATCACCTCGG   |
| <i>CATA_qRT_R</i>   | GTCGGTATAGAATCTCGTGGC   |
| <i>CATB_qRT_F</i>   | CTTTCCTCTCACTTCCTCTTCC  |
| <i>CATB_qRT_R</i>   | AGTCAACTAACCCTTGGTGTG   |
| <i>MoLDS1_qRT_F</i> | CTACAACCATCCCTTCAACCC   |
| <i>MoLDS1_qRT_R</i> | GAGTCAAAGATCAGCCCAGG    |
| <i>MoLDS2_qRT_F</i> | CTTCCCTAACCCTACTACGCC   |
| <i>MoLDS2_qRT_R</i> | GACCCAGACTCTCCATAATCTTC |
| <i>MoPRX1_qRT_F</i> | TGGATCAAGGACATCAACGAC   |
| <i>MoPRX1_qRT_R</i> | GCGGATGGTAAAGGCAATTC    |
| <i>TPX1_qRT_F</i>   | CCCGTGGAGTGTTTCGTTATTG  |
| <i>TPX2_qRT_R</i>   | CCTTAGCCTCTTCAACCTTGG   |
| <i>MoPRX2_qRT_F</i> | AGCCACATCCCTTCATACATG   |
| <i>MoPRX2_qRT_R</i> | GCCCAAGCCTTCATAACAAAG   |
| <i>MoPRX3_qRT_F</i> | TTGTCATCGTCAGTGTTCCG    |
| <i>MoPRX3_qRT_R</i> | CTTCTCGACGTAGCTCTTGAG   |
| <i>MoVPX1_qRT_F</i> | TCACTCCATACCTCCCTGAG    |
| <i>MoVPX1_qRT_R</i> | GTTTTCCTGGCGATGCTTG     |
| <i>MoCMD1_qRT_F</i> | CTCTCGGATAAGCAGTGGG     |
| <i>MoCMD1_qRT_R</i> | GTGATCTCGACAACCTCACG    |
| <i>HYR1_qRT_F</i>   | GACTACAAGGGCAAGGTCCG    |
| <i>HYR1_qRT_R</i>   | GAAGCCGAGGATGGTAAAGTC   |

---
